# Supplementary material for: A magnesium-based multifunctional metal–organic framework: synthesis, thermally induced structural variation, selective gas adsorption, photoluminescence and heterogeneous catalytic study
Source: Royal Society of Chemistry journal article supplement (doi:10.1039/c3dt51509e), 2013-01-01

## Supplementary data

# **Magnesium-based multifunctional metal-organic framework: Synthesis, thermally induced structural variation, selective gas adsorption, photoluminescence and heterogeneous catalytic study**

**Debraj Saha, Tanmoy Maity, Soma Das and Subratanath Koner\***

*Department of Chemistry, Jadavpur University, Kolkata 700 032, India*

**Table S1**

Intermolecular contacts for compounds **1** (Å, °)

| D-H...A    | d(D-H)  | d(H-A)  | d(D...A)  | ∠DHA    | Symmetry transform  |
|------------|---------|---------|-----------|---------|---------------------|
| O4-H1...O5 | 0.81(3) | 2.04(3) | 2.824(15) | 165(2)  | 2-x, y, 3/2-z       |
| O4-H2...O5 | 0.81(3) | 1.99(3) | 2.794(15) | 176(2)  | x, -y, -1/2+z       |
| O3-H3...O7 | 0.87(2) | 1.82(2) | 2.674(14) | 168(2)  | -                   |
| O3-H4...O5 | 0.83(2) | 1.91(2) | 2.725(15) | 169(2)  | 3/2-x, 1/2+y, 3/2-z |
| O7-H5...O6 | 0.90(3) | 1.82(3) | 2.693(15) | 164(2)  | -1/2+x, -1/2+y, z   |
| N5-H6...O6 | 0.91(2) | 1.98(2) | 2.814(15) | 152(18) | -                   |

**Table S2**

Solvent effect in aldol condensation of *p*-nitrobenzaldehyde with acetone catalyzed by compound **1**<sup>i</sup>

| Solvent         | product                | Isolated yield (wt %) | Selectivity (wt %) |
|-----------------|------------------------|-----------------------|--------------------|
| THF             | $\beta$ -aldol product | 62                    | 100                |
| THF-water (9:1) | $\beta$ -aldol product | 75                    | 100                |
| THF-water (7:1) | $\beta$ -aldol product | 79                    | 100                |
| THF-water (5:1) | $\beta$ -aldol product | 81                    | 100                |
| THF-water (3:1) | $\beta$ -aldol product | 82                    | 100                |
| THF-water (1:1) | $\beta$ -aldol product | 72                    | 100                |
| Water           | $\beta$ -aldol product | 29                    | 100                |

<sup>†</sup>Reaction conditions: *p*-nitrobenzaldehyde (2 mmol), acetone (4 mmol), tetrahydrofuran (3 ml), water (1 ml) and catalysts (5 mg); temperature = 5-10 °C. Yields were isolated after 6 h of reaction.

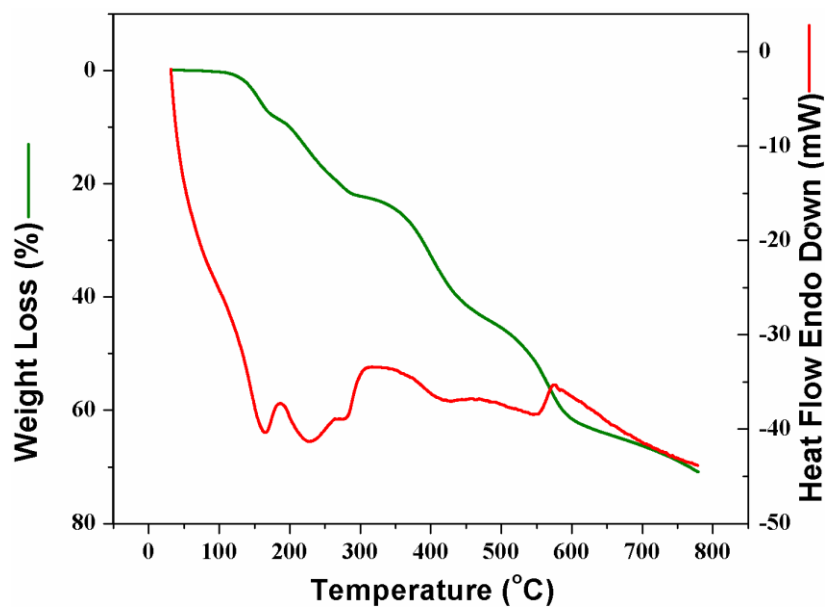

**Fig. S1.** TGA and DTA curve of compound **1**.

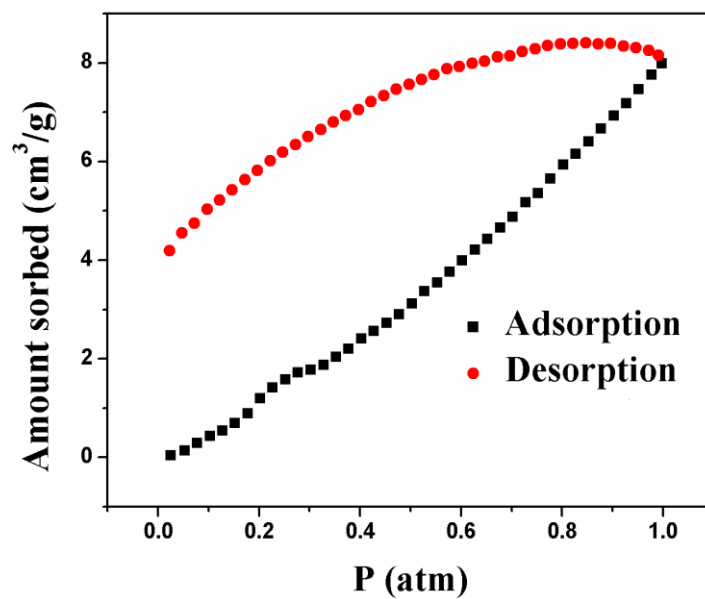

**Fig. S2.** CO<sub>2</sub> adsorption-desorption isotherm of compound **1** at 298 K.

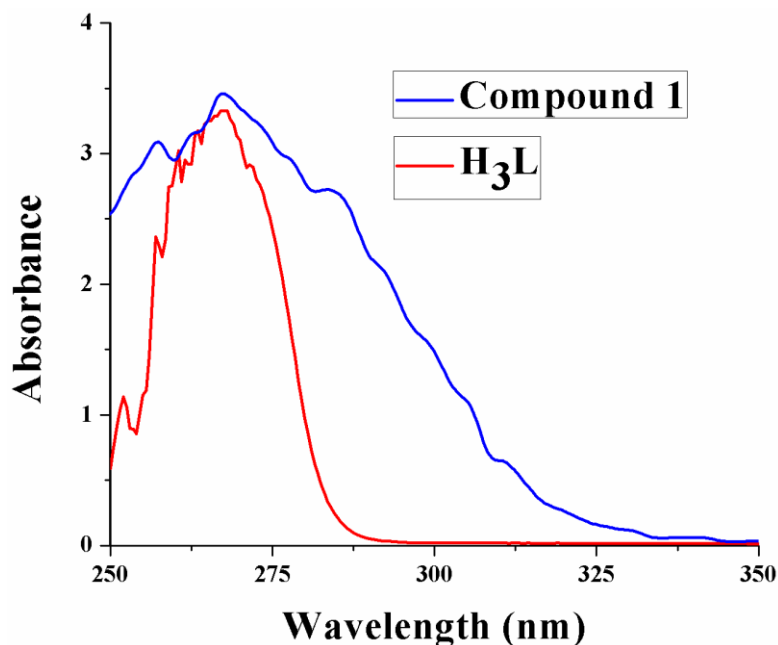

**Fig. S3.** Solid state UV-VIS spectra of ligand and compound **1**

## General Information

All chemicals were purchased from Aldrich and were used as received except benzaldehyde. All solvents used were analytical grade and were used as received from Merck India Pvt. Ltd. Liquid aldehydes were distilled before use. Benzaldehyde was kept over NaA molecular sieves to trap possible traces of benzoic acid. All reactions were carried out in air, without any special precautions. Column chromatography was performed over silica gel (mesh 60-120) and hexane/ethyl acetate combination was used as the eluent. <sup>1</sup>H NMR spectra were recorded at ambient temperature in CDCl<sub>3</sub> with tetramethylsilane as internal standard. The chemical shifts ( $\delta$ ) and coupling constants ( $J$ ) were expressed in ppm and Hz, respectively on Bruker Avance 300 instrument.

Elemental analysis of the products was performed by using Perkin-Elmer 240C elemental analyzer.

## Characterization of Products

4-hydroxy-4-(4-nitrophenyl)-butan-2-one (Table 3, entry 1):

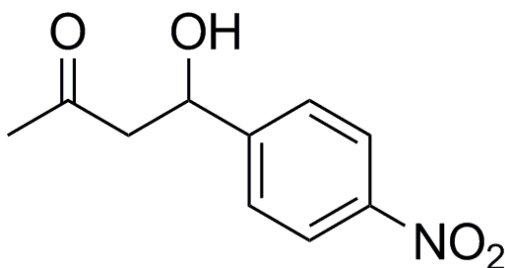

$^1\text{H}$  NMR (300 MHz,  $\text{CDCl}_3$ ):  $\delta$  (ppm): 8.07 (d,  $J = 8.8$  Hz, 2H), 7.47 (d,  $J = 8.5$  Hz, 2H), 5.20 (m, 1H), 3.57 (br s, 1H), 2.81 (m, 2H), 2.15 (s, 3H); Anal. Calcd. for  $\text{C}_{10}\text{H}_{11}\text{NO}_4$ : C, 57.41%; H, 5.30%; N, 6.69%. Found: C, 57.6%; H, 5.4%; N, 6.6%.

4-hydroxy-4-(2-nitrophenyl)-butan-2-one (Table 3, entry 2):

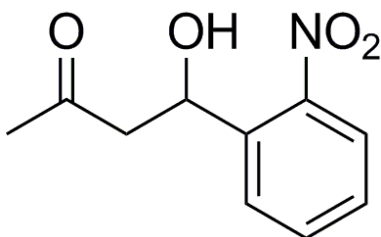

$^1\text{H}$  NMR (300 MHz,  $\text{CDCl}_3$ ):  $\delta$  (ppm): 7.75 (d,  $J = 8.4$  Hz, 1H), 7.72 (d,  $J = 10.0$  Hz, 1H), 7.50 (t,  $J = 7.6$  Hz, 1H), 7.27 (t,  $J = 7.9$  Hz, 1H), 5.52 (m, 1H), 3.93 (br s, 1H), 2.86 (d,  $J = 17.2$  Hz, 1H), 2.63 (dd,  $J = 17.2, 9.3$  Hz, 1H), 2.06 (s, 3H); Anal. Calcd. for  $\text{C}_{10}\text{H}_{11}\text{NO}_4$ : C, 57.41%; H, 5.30%; N, 6.69%. Found: C, 57.4%; H, 5.3%; N, 6.6%.

4-hydroxy-4-(3-nitrophenyl)-butan-2-one (table 3, entry 3):

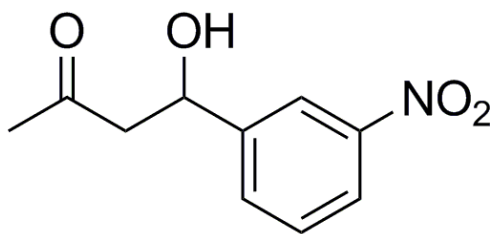

$^1\text{H}$  NMR (300 MHz,  $\text{CDCl}_3$ ):  $\delta$  (ppm): 8.12 (s, 1H), 7.97 (d,  $J = 8.1$  Hz, 1H), 7.61 (d,  $J = 8.0$  Hz, 1H), 7.41 (t,  $J = 7.9$  Hz, 1H), 5.17 (m, 1H), 3.69 (br s, 1H), 2.81 (m, 2H), 2.13 (s, 3H); Anal. Calcd. for  $\text{C}_{10}\text{H}_{11}\text{NO}_4$ : C, 57.41%; H, 5.30%; N, 6.69%. Found: C, 57.4%; H, 5.3%; N, 6.7%.

4-hydroxy-4-(2-chlorophenyl)-butan-2-one (Table 3, entry 4):

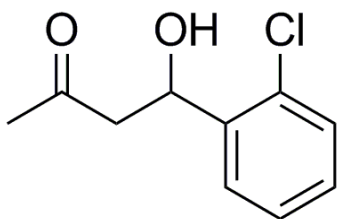

$^1\text{H}$  NMR (300 MHz,  $\text{CDCl}_3$ ):  $\delta$  (ppm): 7.62 (d,  $J = 7.2$  Hz, 1H), 7.34-7.19 (m, 3H), 5.51 (d,  $J = 9.7$  Hz, 1H), 3.53 (br s, 1H), 3.03-2.97 (dd,  $J = 17.8$  Hz, 2 Hz, 1H), 2.72-2.63 (dd,  $J = 17.8$  Hz, 9.7 Hz, 1H), 2.22 (s, 3H); Anal. Calcd. for  $\text{C}_{10}\text{H}_{11}\text{ClO}_2$ : C, 60.46%; H, 5.58%. Found: C, 60.5%; H, 5.6%.

4-hydroxy-4-(3-chlorophenyl)-butan-2-one (Table 3, entry 5):

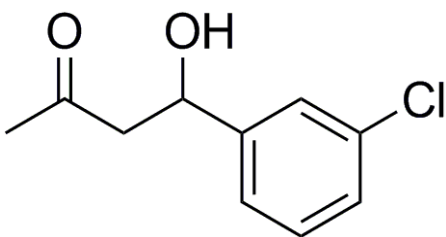

$^1\text{H}$  NMR (300 MHz,  $\text{CDCl}_3$ ):  $\delta$  (ppm): 7.35 (s, 1H), 7.29-7.18 (m, 3H), 5.12-5.08 (m, 1H), 3.49 (s, 1H), 2.89-2.79 (m, 2H), 2.18 (s, 3H); Anal. Calcd. for  $\text{C}_{10}\text{H}_{11}\text{ClO}_2$ : C, 60.46%; H, 5.58%. Found: C, 60.4%; H, 5.6%.

4-hydroxy-4-(4-chlorophenyl)butan-2-one (Table 3, entry 6):

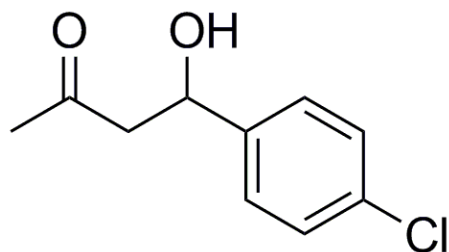

$^1\text{H}$  NMR (300 MHz,  $\text{CDCl}_3$ ):  $\delta$  (ppm): 7.45 (d,  $J = 8.4$  Hz, 2H), 7.21 (d,  $J = 8.3$  Hz, 2H), 5.10-5.07 (m, 1H), 3.47 (d,  $J = 3.1$  Hz, 1H), 2.82-2.78 (m, 2H), 2.17 (s, 3H); Anal. Calcd. for  $\text{C}_{10}\text{H}_{11}\text{ClO}_2$ : C, 60.46%; H, 5.58%. Found: C, 60.4%; H, 5.5%.

4-hydroxy-4-phenylbutan-2-one (Table 3, entry 7):

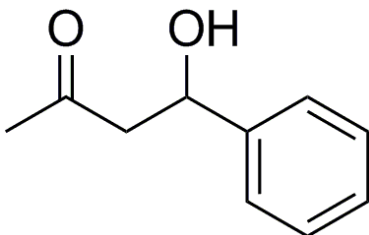

$^1\text{H}$  NMR (300 MHz,  $\text{CDCl}_3$ ):  $\delta$  (ppm): 7.3 (m, 5H), 5.16 (m, 1H), 3.25 (br s, 1H), 2.88 (m, 2H), 2.15 (s, 3H); Anal. Calcd. for  $\text{C}_{10}\text{H}_{12}\text{O}_2$ : C, 73.15%; H, 7.27%. Found: C, 73.2%; H, 7.2%.

4-hydroxy-4-(4-methoxyphenyl)-butan-2-one (Table 3, entry 8):

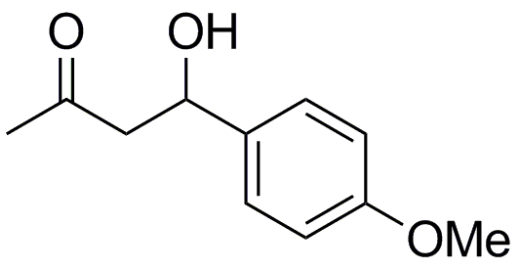

$^1\text{H}$  NMR (300 MHz,  $\text{CDCl}_3$ ):  $\delta$  (ppm): 7.2 (d,  $J = 8.8$  Hz, 2H), 6.9 (d,  $J = 8.8$  Hz, 2H), 4.9 (d,  $J = 8.2$  Hz, 1H), 4.05 (br s, 1H), 3.8 (s, 3H), 2.75 (m, 2H), 2.15 (s, 3H); Anal. Calcd. for  $\text{C}_{11}\text{H}_{14}\text{O}_3$ : C, 68.02%; H, 7.27%. Found: C, 68.0%; H, 7.2%.

4-hydroxy-4-(4-methylphenyl)-butan-2-one (Table 3, entry 9):

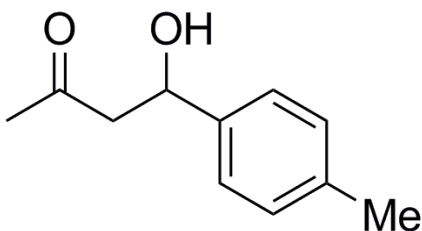

$^1\text{H}$  NMR (300 MHz,  $\text{CDCl}_3$ ):  $\delta$  (ppm): 7.25 (d,  $J = 8.3$  Hz, 2H), 7.16 (d,  $J = 8.1$  Hz, 2H), 5.12 (d,  $J = 8.9$  Hz, 1H), 3.21 (d,  $J = 3.1$  Hz, 1H), 2.87-2.81 (m, 2H), 2.34 (s, 3H), 2.22 (s, 3H); Anal. Calcd. for  $\text{C}_{11}\text{H}_{14}\text{O}_3$ : C, 74.13%; H, 7.92%. Found: C, 74.0%; H, 7.9%.

3-hydroxy-3-(4-nitrophenyl)-1-phenylpropane-1-one (Table 3, entry 10):

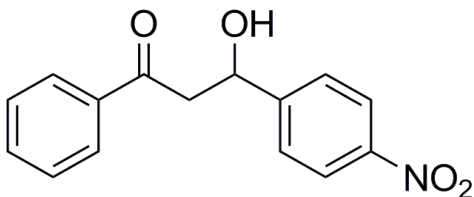

$^1\text{H}$  NMR (300 MHz,  $\text{CDCl}_3$ ):  $\delta$  (ppm): 8.24 (d,  $J = 8.8$  Hz, 2H), 7.95 (d,  $J = 8.1$  Hz, 2H), 7.64-7.59 (m, 3H), 7.5-7.45 (m, 2H), 5.46 (d, 8.6 Hz, 1H), 3.84 (d, 3.1 Hz, 1H), 3.39-3.37 (m, 2H); Anal. Calcd. for  $\text{C}_{15}\text{H}_{13}\text{NO}_4$ : C, 66.41%; H, 4.83%; N, 5.16%. Found: C, 66.4%; H, 4.8%; N, 5.2%.

3-hydroxy-3-(2-nitrophenyl)-1-phenylpropane-1-one (Table 3, entry 11):

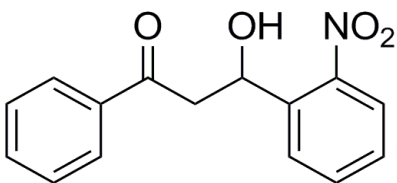

$^1\text{H}$  NMR (300 MHz,  $\text{CDCl}_3$ ):  $\delta$  (ppm): 8.00-7.96 (m, 4H), 7.7 (t,  $J = 7.6$  Hz, 1H), 7.6 (t,  $J = 7.4$  Hz, 1H), 7.5-7.45 (m, 3H), 5.86 (d,  $J = 9.3$  Hz, 1H), 4 (d,  $J = 3$  Hz, 1H), 3.77-3.71 (dd,  $J = 18.6$  Hz, 2.1 Hz, 1H), 3.25-3.16 (dd,  $J = 17.7$  Hz, 9.3 Hz, 1H); Anal. Calcd. for  $\text{C}_{15}\text{H}_{13}\text{NO}_4$ : C, 66.41%; H, 4.83%; N, 5.16%. Found: C, 66.4%; H, 4.8%; N, 5.1%.

3-hydroxy-3-(3-nitrophenyl)-1-phenylpropane-1-one (Table 3, entry 12):

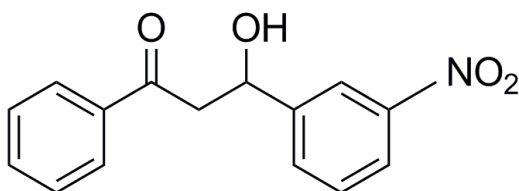

$^1\text{H}$  NMR (300 MHz,  $\text{CDCl}_3$ ):  $\delta$  (ppm): 8.32 (s, 1H), 8.16 (d,  $J = 9.4$  Hz, 1H), 7.95 (d,  $J = 8.4$  Hz, 2H), 7.79 (d,  $J = 8.3$  Hz, 1H), 7.64-7.58 (m, 2H), 7.53-7.46 (m, 2H), 5.48-5.43 (m, 1H), 3.88-3.87 (m, 1H), 3.42-3.38 (m, 2H); Anal. Calcd. for  $\text{C}_{15}\text{H}_{13}\text{NO}_4$ : C, 66.41%; H, 4.83%; N, 5.16%. Found: C, 66.3%; H, 4.8%; N, 5.1%.

3-hydroxy-3-(2-chlorophenyl)-1-phenylpropane-1-one (Table 3, entry 13):

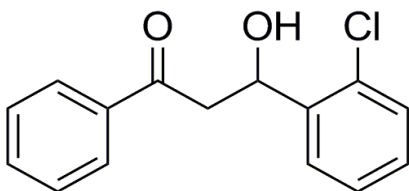

$^1\text{H}$  NMR (300 MHz,  $\text{CDCl}_3$ ):  $\delta$  (ppm): 7.97 (d,  $J = 7.6$  Hz, 2H), 7.72 (d,  $J = 7.9$  Hz, 1H), 7.58 (d,  $J = 7.5$  Hz, 1H), 7.47 (t,  $J = 7.4$  Hz, 2H), 7.37-7.24 (m, 3H), 5.69 (d,  $J = 9.1$  Hz, 1H), 3.83 (d,  $J = 3$  Hz, 1H), 3.61-3.54 (dd,  $J = 17.7$  Hz, 2.1 Hz, 1H), 3.19-3.10 (dd,  $J = 17.8$  Hz, 9.6 Hz, 1H); Anal. Calcd. for  $\text{C}_{15}\text{H}_{13}\text{ClO}_2$ : C, 69.10%; H, 5.03%. Found: C, 69.0%; H, 5.0%.

3-hydroxy-3-(3-chlorophenyl)-1-phenylpropane-1-one (Table 3, entry 14):

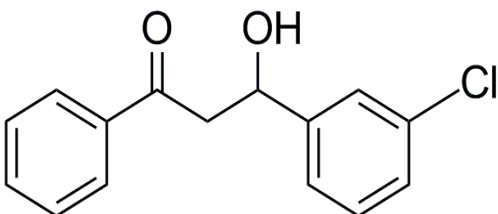

$^1\text{H}$  NMR (300 MHz,  $\text{CDCl}_3$ ):  $\delta$  (ppm): 7.98-7.24 (m, 9H), 5.35-5.26 (m, 1H), 3.71 (d,  $J = 3$  Hz, 1H), 3.48-3.43 (m, 2H); Anal. Calcd. for  $\text{C}_{15}\text{H}_{13}\text{ClO}_2$ : C, 69.10%; H, 5.03%. Found: C, 69.1%; H, 5.0%.

3-hydroxy-3-(4-chlorophenyl)-1-phenylpropane-1-one (Table 3, entry 15):

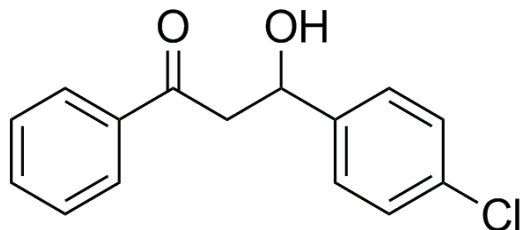

$^1\text{H}$  NMR (300 MHz,  $\text{CDCl}_3$ ):  $\delta$  (ppm): 7.96-7.35 (m, 9H), 5.39 (d,  $J = 9.2$  Hz, 1H), 3.65 (d,  $J = 3$  Hz, 1H), 3.50-3.19 (m, 2H); Anal. Calcd. for  $\text{C}_{15}\text{H}_{13}\text{ClO}_2$ : C, 69.10%; H, 5.03%. Found: C, 69.0%; H, 5.0%.

3-hydroxy-1,3-biphenylpropane-1-one (Table 3, entry 16):

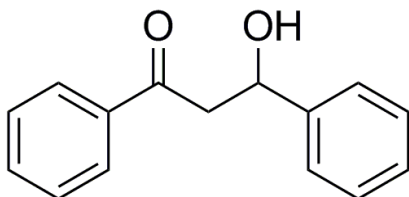

$^1\text{H}$  NMR (300 MHz,  $\text{CDCl}_3$ ):  $\delta$  (ppm): 7.92 (d,  $J = 7.4$  Hz, 2H), 7.55-7.27 (m, 8H), 5.30-5.26 (m, 1H), 3.67 (s, 1H), 3.42-3.29 (m, 2H); Anal. Calcd. for  $\text{C}_{15}\text{H}_{14}\text{O}_2$ : C, 79.62%; H, 6.24%. Found: C, 79.5%; H, 6.2%.

3-hydroxy-3-(4-methoxyphenyl)-1-phenylpropane-1-one (Table 3, entry 17):

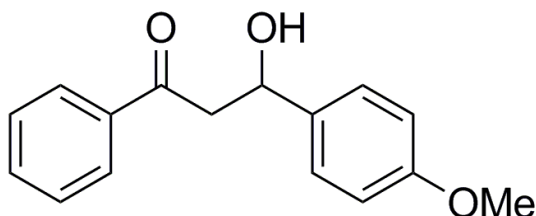

$^1\text{H}$  NMR (300 MHz,  $\text{CDCl}_3$ ):  $\delta$  (ppm): 7.92 (d,  $J = 7.4$  Hz, 2H), 7.43-7.24 (m, 5H), 6.92-6.88 (m, 2H), 5.32-5.28 (m, 1H), 3.80 (s, 3H), 3.5 (br s, 1H), 3.37-3.34 (m, 2H); Anal. Calcd. for  $\text{C}_{16}\text{H}_{16}\text{O}_3$ : C, 74.98%; H, 6.29%. Found: C, 74.9%; H, 6.2%.

3-hydroxy-3-(4-tolyl)-1-phenylpropane-1-one (Table 3, entry 18):

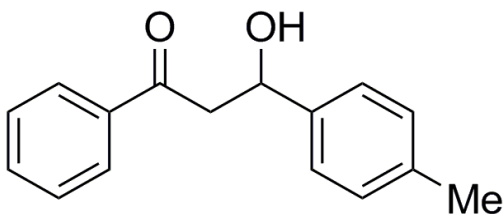

$^1\text{H}$  NMR (300 MHz,  $\text{CDCl}_3$ ):  $\delta$  (ppm): 7.96-7.93 (m, 2H), 7.52-7.18 (m, 7H), 5.31-5.28 (m, 1H), 3.52 (s, 1H), 3.37-3.30 (m, 2H), 2.38 (s, 3H); Anal. Calcd. for  $\text{C}_{16}\text{H}_{16}\text{O}_2$ : C, 79.97%; H, 6.71%. Found: C, 79.9%; H, 6.6%.

2-(hydroxy-(4-nitrophenyl)-methyl)-cyclopentanone (Table 3, entry 19):

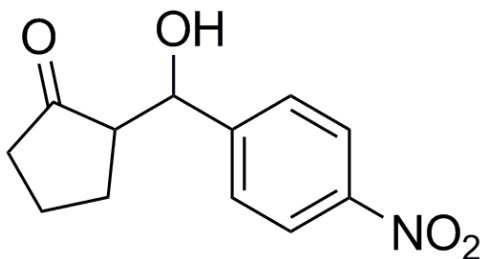

$^1\text{H}$  NMR (300 MHz,  $\text{CDCl}_3$ ):  $\delta$  (ppm): 8.24 (d,  $J = 8.8$  Hz, 2H), 7.55-7.5 (m, 2H), 4.86 (d,  $J = 9.2$  Hz, 1H), 3.84 (d,  $J = 3.1$  Hz, 1H), 2.51-1.69 (m, 7H); Anal. Calcd. for  $\text{C}_{12}\text{H}_{13}\text{NO}_4$ : C, 61.27%; H, 5.57%; N, 5.95%. Found: C, 61.3%; H, 5.6%; N, 5.9%.

2-(hydroxy-(2-nitrophenyl)-methyl)-cyclopentanone (Table 3, entry 20):

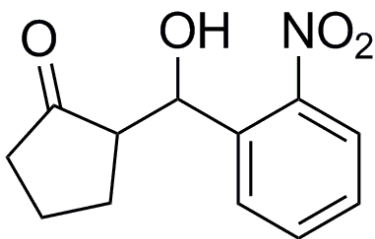

$^1\text{H}$  NMR (300 MHz,  $\text{CDCl}_3$ ):  $\delta$  (ppm): 8.02 (d,  $J = 8.1$  Hz, 1H), 7.91 (d,  $J = 8.1$  Hz, 1H), 7.64-7.59 (m, 1H), 7.5-7.45 (m, 1H), 5.46 (d,  $J = 8.6$  Hz, 1H), 4 (d,  $J = 2.9$  Hz, 1H), 2.64-

1.61 (m, 7H); Anal. Calcd. for  $C_{12}H_{13}NO_4$ : C, 61.27%; H, 5.57%; N, 5.95%. Found: C, 61.2%; H, 5.5%; N, 5.9%.

2-(hydroxy-(3-nitrophenyl)-methyl)-cyclopentanone (Table 3, entry 21)

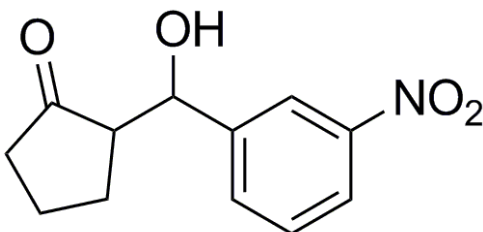

$^1H$  NMR (300 MHz,  $CDCl_3$ ):  $\delta$  (ppm): 8.23 (s, 1H), 8.18-8.11 (m, 1H), 7.71-7.66 (m, 1H), 7.56-7.5 (m, 1H), 4.84-4.79 (m, 1H), 3.63 (d,  $J = 4.9$  Hz, 1H), 2.50-1.71 (m, 7H); Anal. Calcd. for  $C_{12}H_{13}NO_4$ : C, 61.27%; H, 5.57%; N, 5.95%. Found: C, 61.2%; H, 5.6%; N, 5.9%.

2-(hydroxy-(2-chlorophenyl)-methyl)-cyclopentanone (Table 3, entry 22):

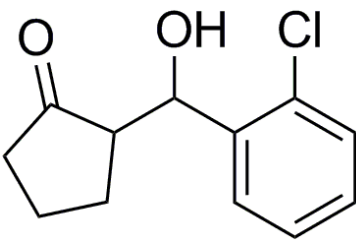

$^1H$  NMR (300 MHz,  $CDCl_3$ ):  $\delta$  (ppm): 7.59 (d,  $J = 1.7$  Hz, 1H), 7.56-7.18 (m, 3H), 5.3 (d,  $J = 9.3$  Hz, 1H), 4.53 (d,  $J = 1.2$  Hz, 1H), 2.47-1.7 (m, 7H); Anal. Calcd. for  $C_{12}H_{13}ClO_2$ : C, 64.15%; H, 5.83%. Found: C, 64.1%; H, 5.8%.

2-(hydroxy-(3-chlorophenyl)-methyl)-cyclopentanone (Table 3, entry 23):

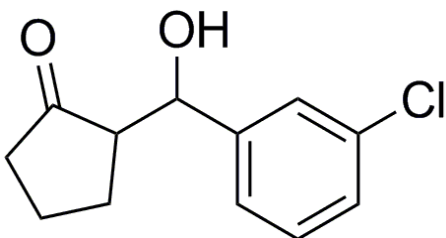

$^1\text{H}$  NMR (300 MHz,  $\text{CDCl}_3$ ):  $\delta$  (ppm): 7.56 (s, 1H), 7.4-7.24 (m, 3H), 4.69 (d,  $J = 9.2$  Hz, 1H), 4.66 (s, 1H), 2.45-1.7 (m, 7H); Anal. Calcd. for  $\text{C}_{12}\text{H}_{13}\text{ClO}_2$ : C, 64.15%; H, 5.83%. Found: C, 64.1%; H, 5.8%.

2-(hydroxy-(4-chlorophenyl)-methyl)-cyclopentanone (Table 3, entry 24):

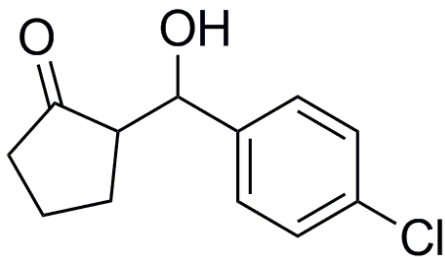

$^1\text{H}$  NMR (300 MHz,  $\text{CDCl}_3$ ):  $\delta$  (ppm): 7.44 (d,  $J = 8.5$  Hz, 2H), 7.19 (d,  $J = 8.3$  Hz, 2H), 5.23 (br, s, 1H), 4.67-4.59 (m, 1H), 2.79 (d,  $J = 4.5$  Hz, 1H), 2.4-1.68 (m, 6H); Anal. Calcd. for  $\text{C}_{12}\text{H}_{13}\text{ClO}_2$ : C, 64.15%; H, 5.83%. Found: C, 64.1%; H, 5.8%.

2-(hydroxy-phenyl-methyl)-cyclopentanone (Table 3, entry 25):

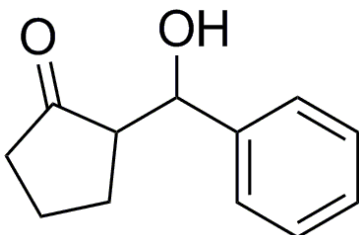

$^1\text{H}$  NMR (300 MHz,  $\text{CDCl}_3$ ):  $\delta$  (ppm): 7.37-7.25 (m, 5H), 4.72 (d,  $J = 9.2$  Hz, 1H), 3.5 (s, 1H), 2.62-1.72 (m, 7H); Anal. Calcd. for  $\text{C}_{12}\text{H}_{13}\text{O}_2$ : C, 75.76%; H, 7.42%. Found: C, 75.7%; H, 7.4%.

2-(hydroxy-(4-methoxyphenyl)-methyl)-cyclopentanone (Table 3, entry 26):

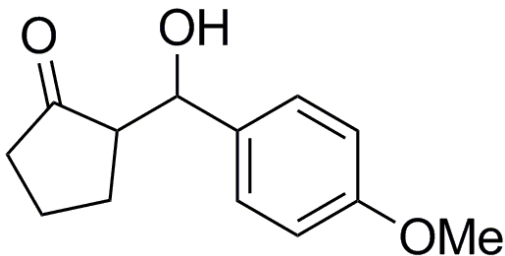

$^1\text{H}$  NMR (300 MHz,  $\text{CDCl}_3$ ):  $\delta$  (ppm): 7.22 (d,  $J = 8.8$  Hz, 2H), 6.9 (d,  $J = 8.8$  Hz, 2H), 5.23 (d,  $J = 5.2$  Hz, 1H), 4.5 (br s, 1H), 3.8 (s, 3H), 2.9-1.6 (m, 7H); Anal. Calcd. for  $\text{C}_{13}\text{H}_{16}\text{O}_3$ : C, 70.89%; H, 7.32%. Found: C, 70.9%; H, 7.3%.

2-(hydroxy-(4-methylphenyl)-methyl)-cyclopentanone (Table 3, entry 27):

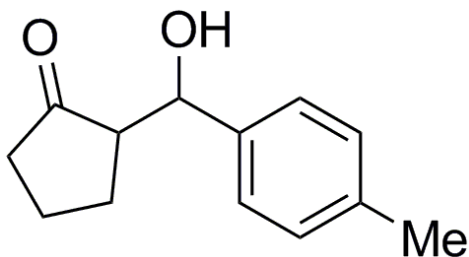

$^1\text{H}$  NMR (300 MHz,  $\text{CDCl}_3$ ):  $\delta$  (ppm): 7.26-7.14 (m, 4H), 4.67 (d,  $J = 9.2$  Hz, 1H), 4.49 (s, 1H), 2.46-1.68 (m, 10H); Anal. Calcd. for  $\text{C}_{13}\text{H}_{16}\text{O}_2$ : C, 76.44%; H, 7.90%. Found: C, 76.5%; H, 7.9%.

## References

- [1] S. Hu, T. Jiang, Z. Zhang, A. Zhu, B. Han, J. Song, Y. Xie, W. Li, *Tetrahedron Lett.* 48 (2007) 5613.
- [2] N. Salin, L. Han, S. Che, O. Terasaki, *Catal. Commun.* 10 (2009) 1386.
- [3] R.F. Lopez, J. Kofoed, M. Machuqueiro, T. Darbre, *Eur. J. Org. Chem.* 35 (2005) 5268.
- [4] C. Wu, X. Fu, S. Li, *Tetrahedron* 67 (2011) 4283.
- [5] R. Gao, C.S. Yi, *ACS Catal.* 1 (2011) 544
- [6] H. Xu, Y. Liu, Y. Fu, Y. Wu *Org. Lett.* 8 (2006) 3449
- [7] Y.M. Xin, Z.Y. Min, *Chem. Res. Chinese. U.* 19 (2003) 432
- [8] R. Sen, D. Saha, S. Koner, *Chem. Eur. J.* 18 (2012) 5979.
- [9] B.M. Choudary, L. Chakrapani, T. Ramani, K.V. Kumar<sup>b</sup>, M.L. Kantam, 62 (2006) 9571
- [10] C. Wu, X. Fu, S. Li, *Eur. J. Org. Chem.* (2011) 1291.
- [11] H.-J. Xu, Y.-C. Liu, Y. Fu, Y.-D. Wu, *Org. Lett.* **2006**, 8, 3449-3451.
- [12] V. Maslak, Z. Tokic-Vujosevic, Z. Ferjancic, R. N. Saicic, *Tetrahedron Letters* 50 (2009) 6709–6711.
- [13] P. Yi-Yuan, L. Han, C. Ming, C. Jin-Pei, *Chine. J. Chem.* **2007**, 25, 962-967.

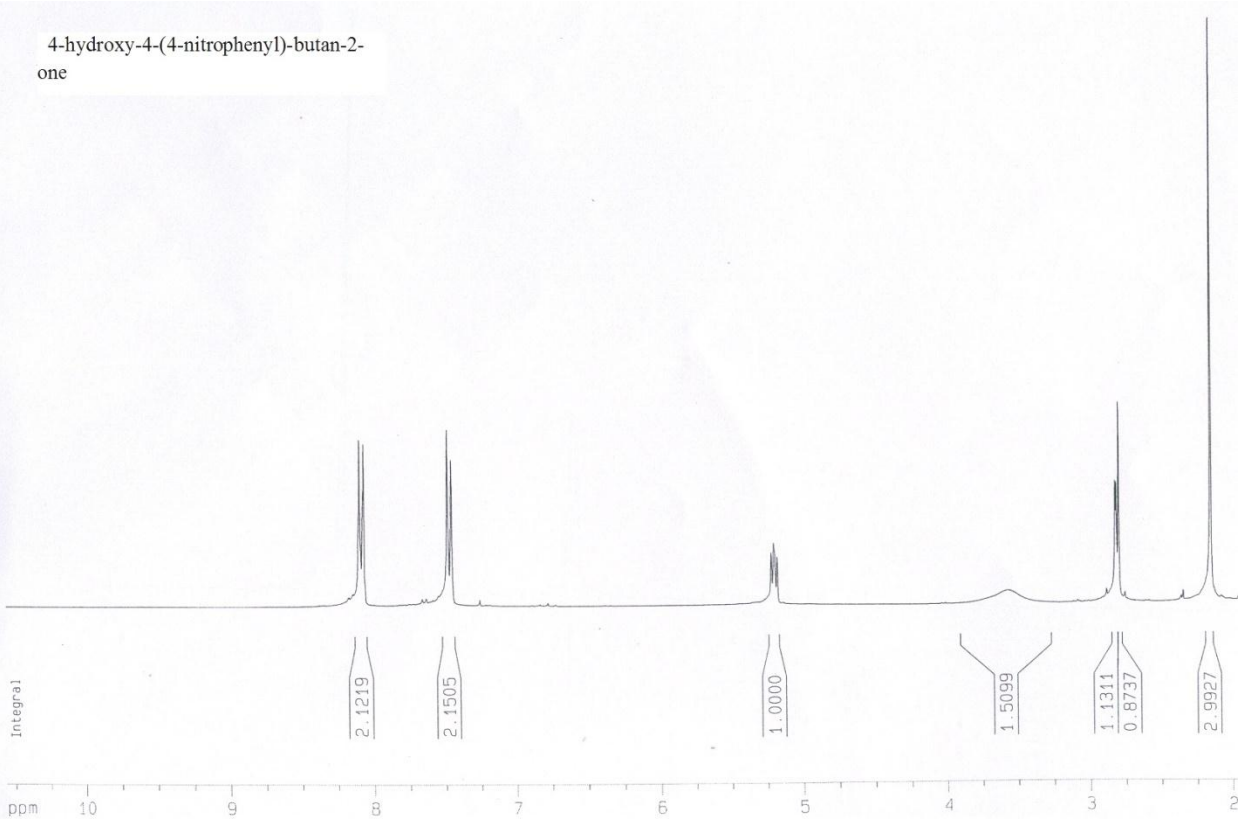

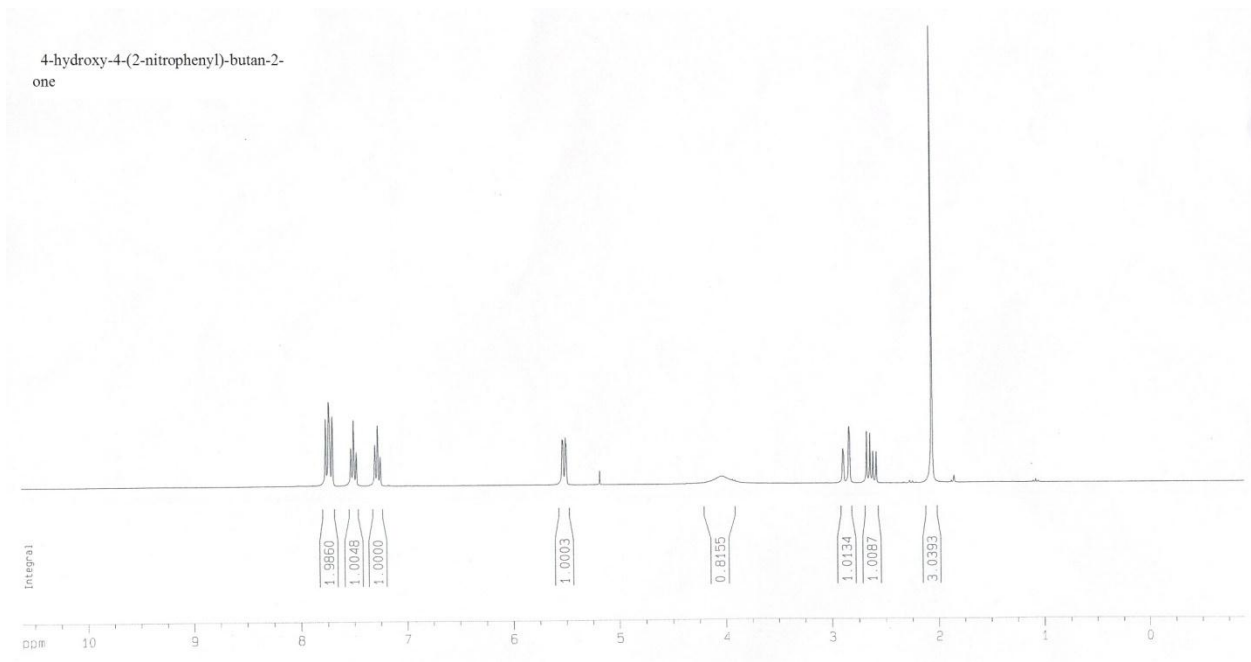

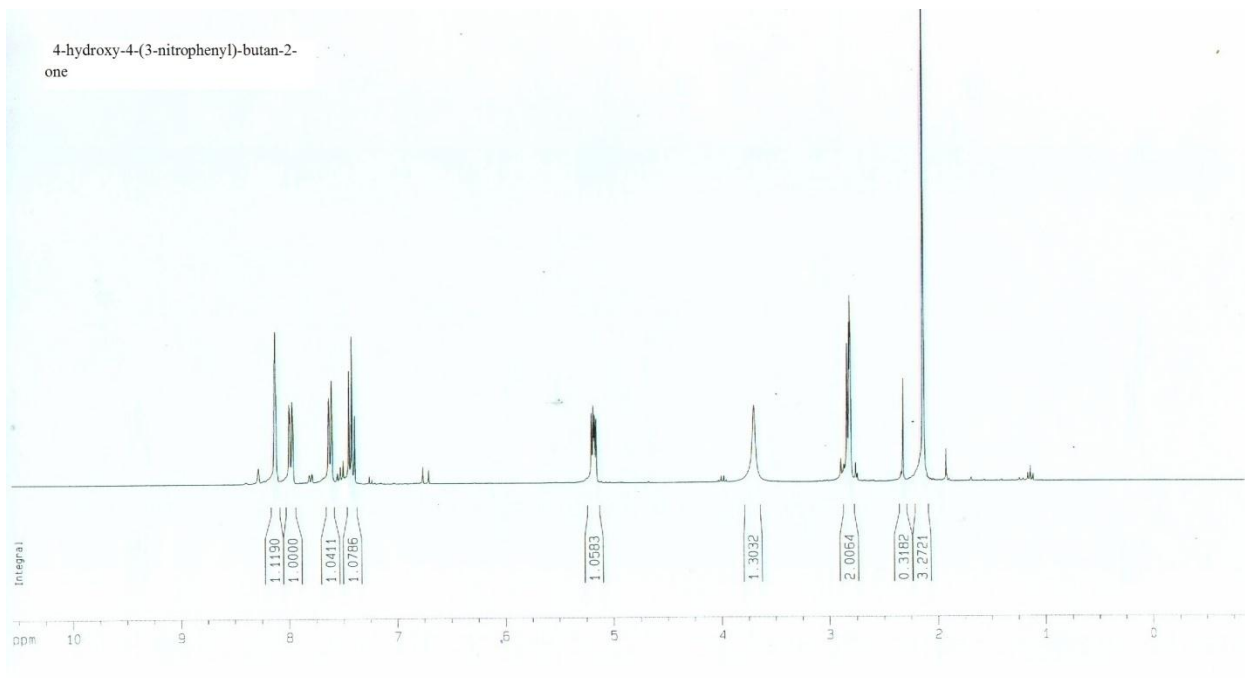

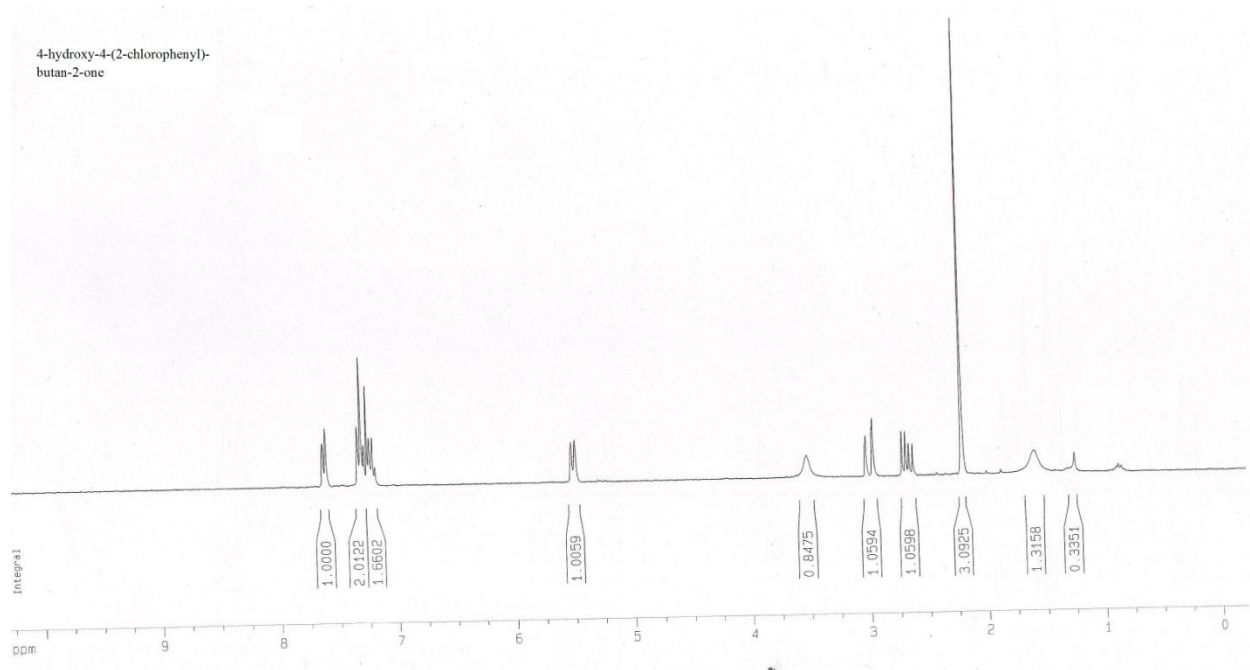

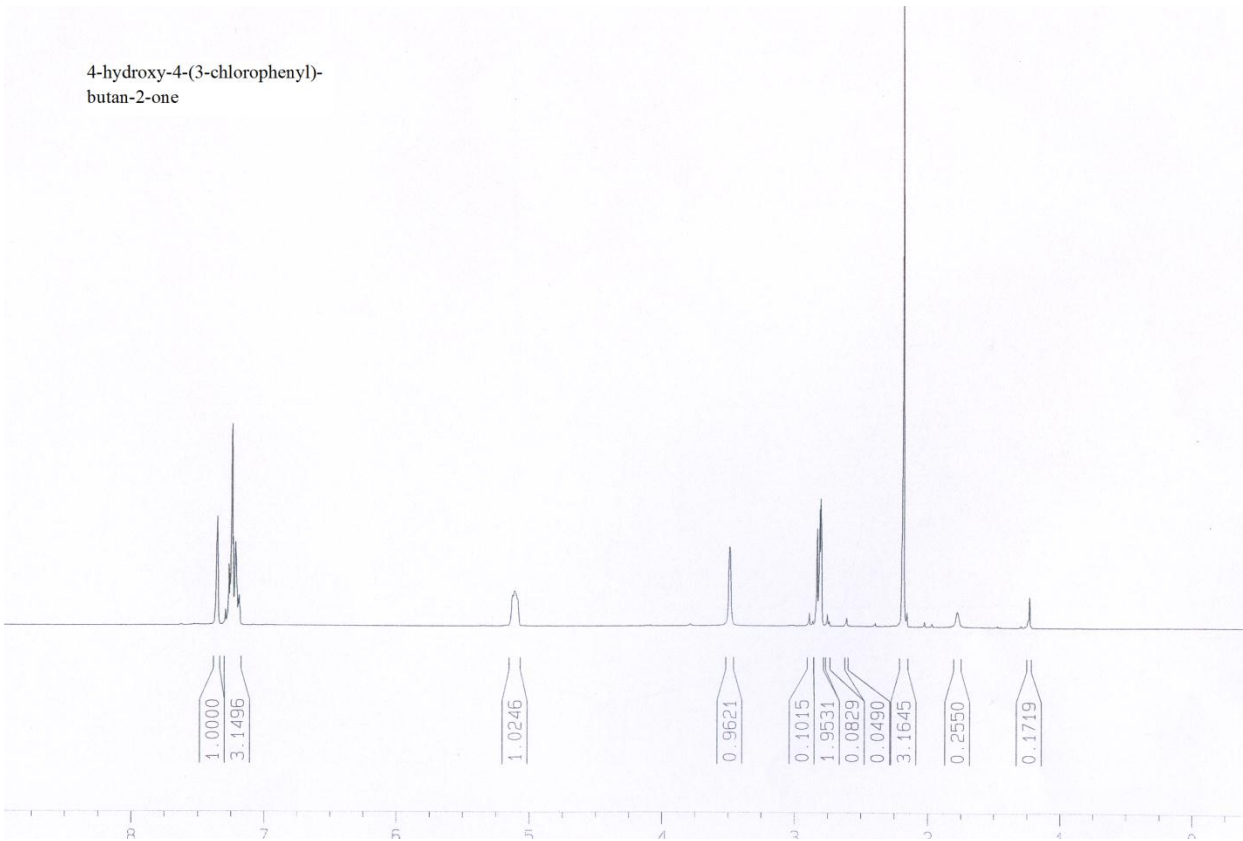

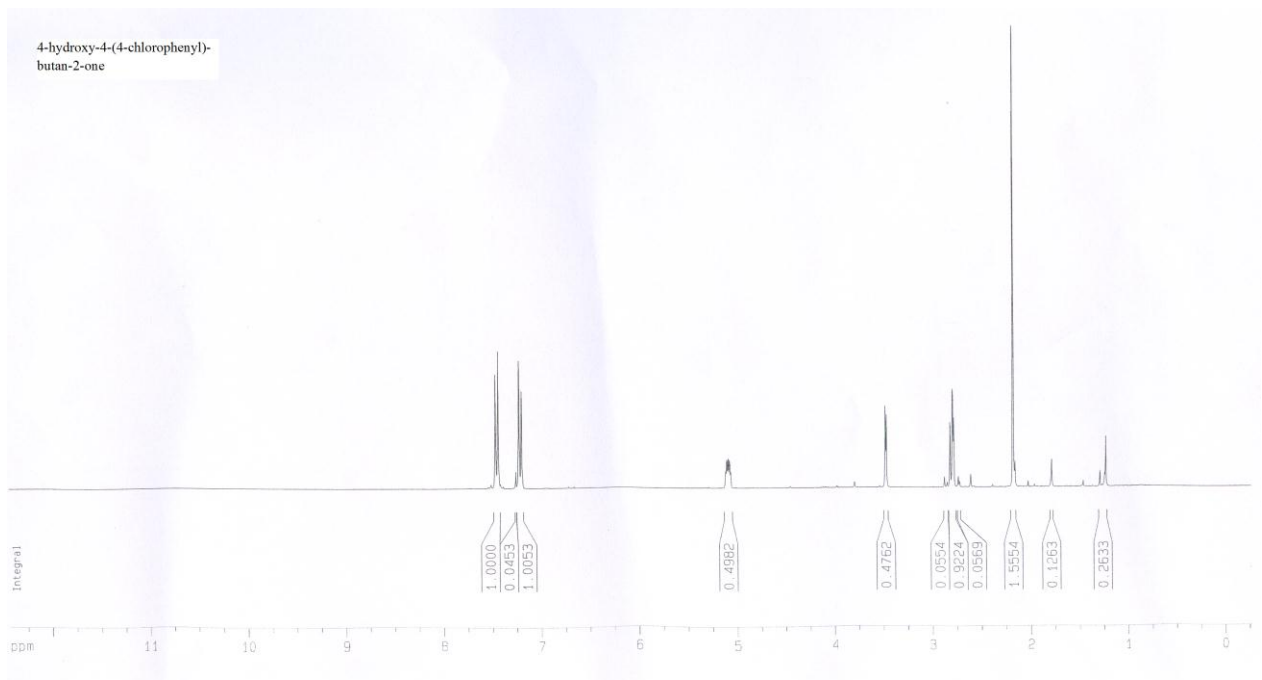

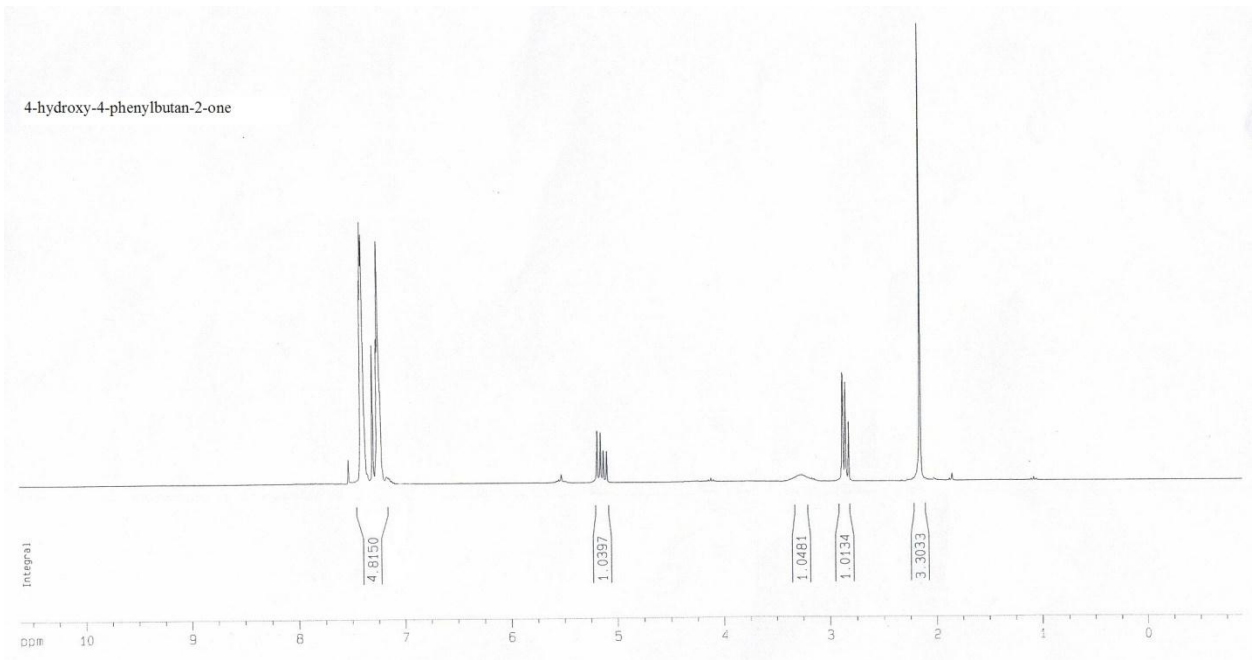

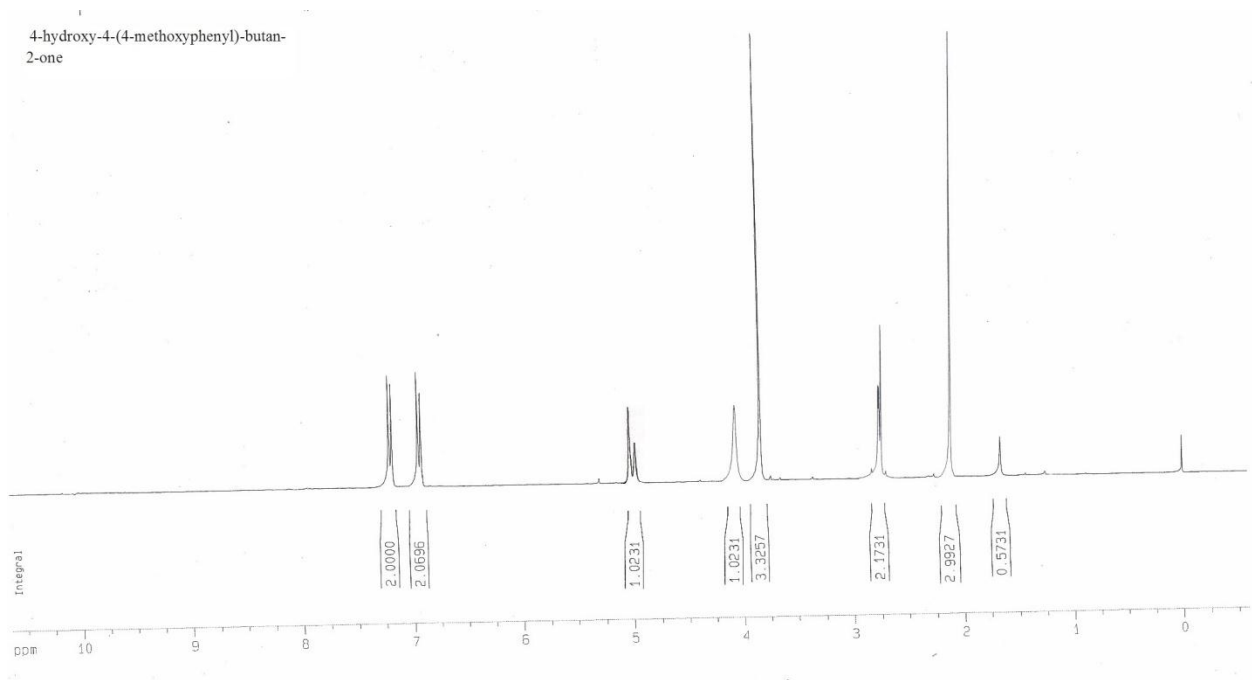

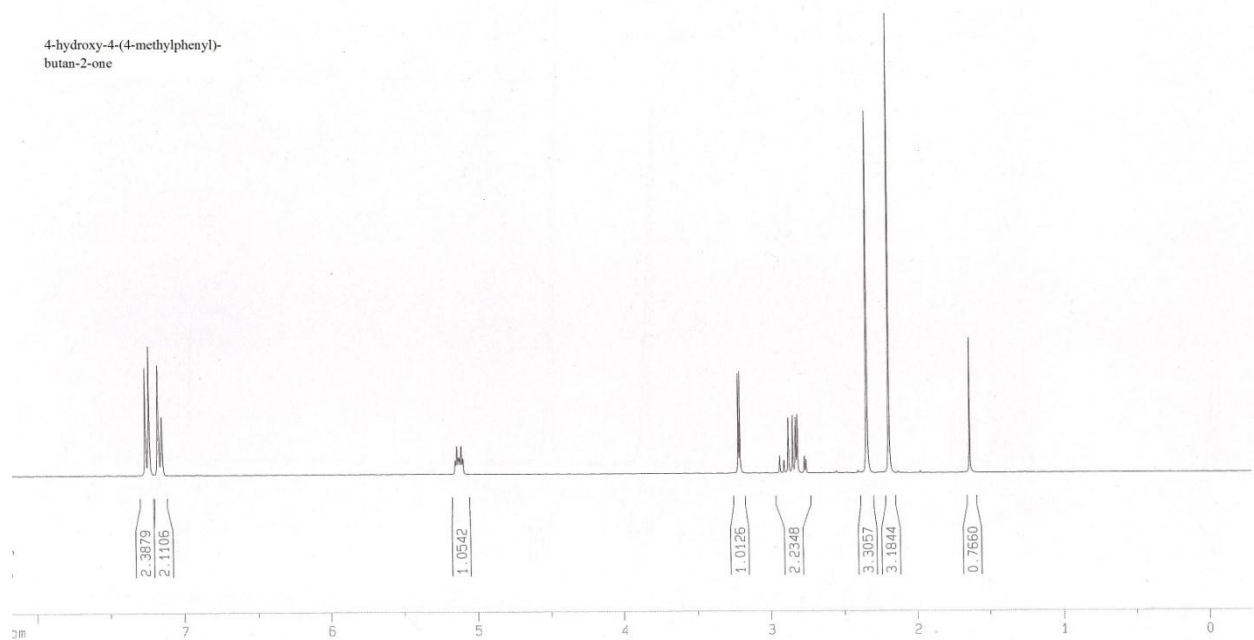

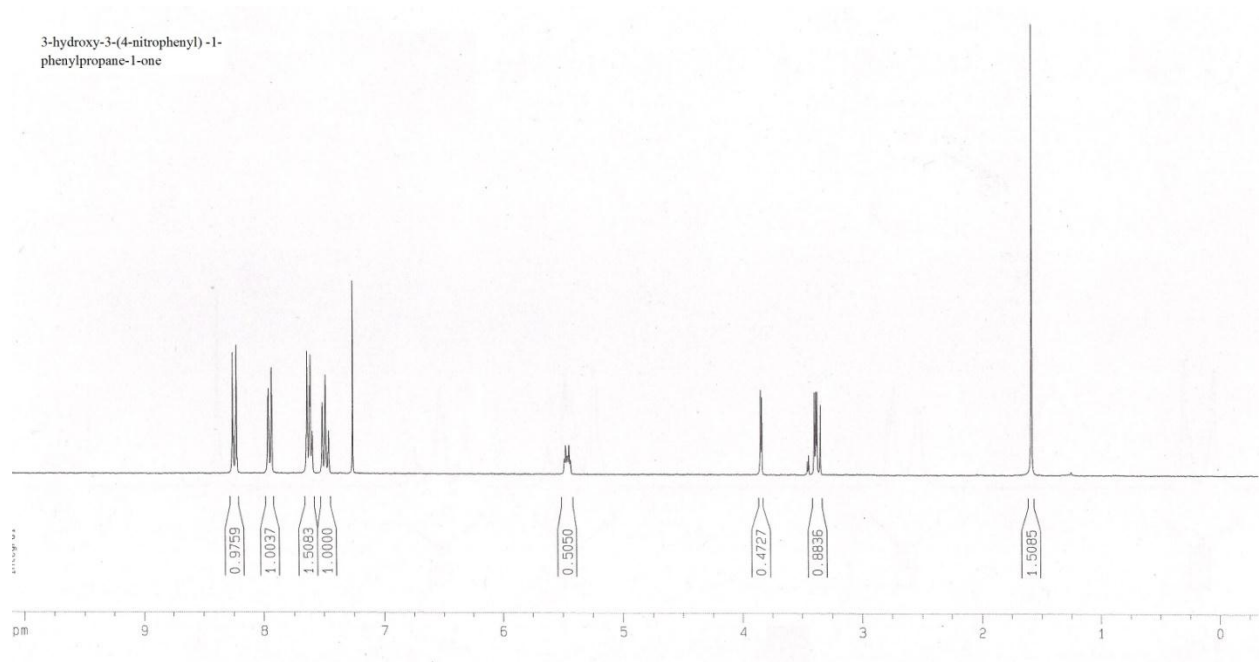

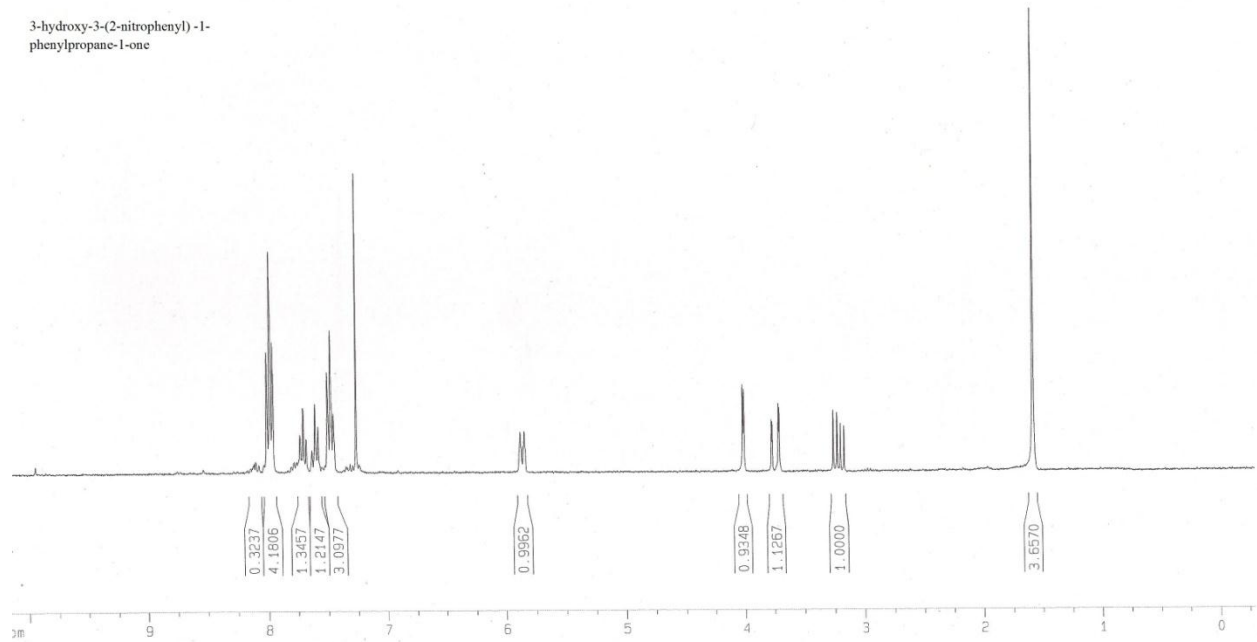

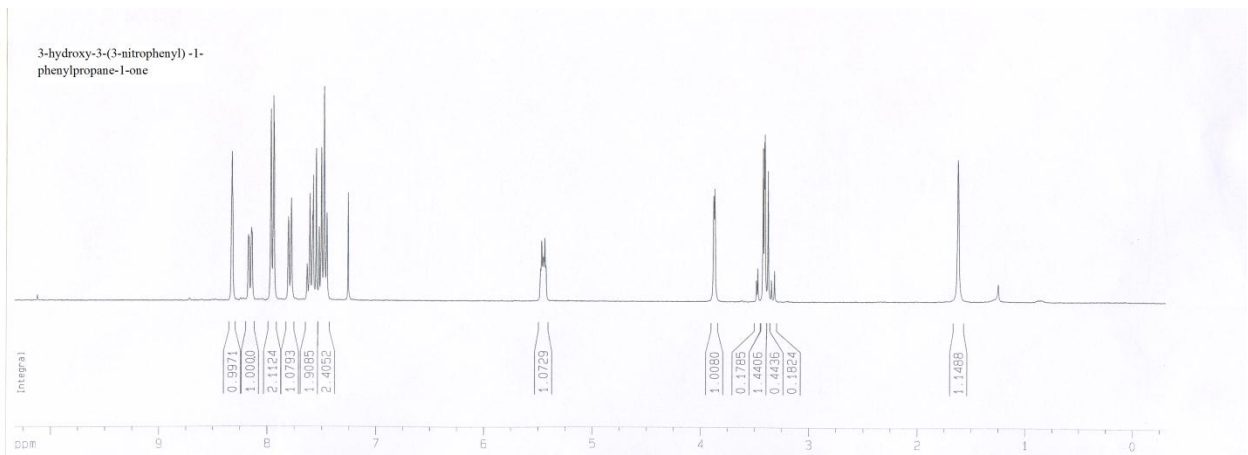

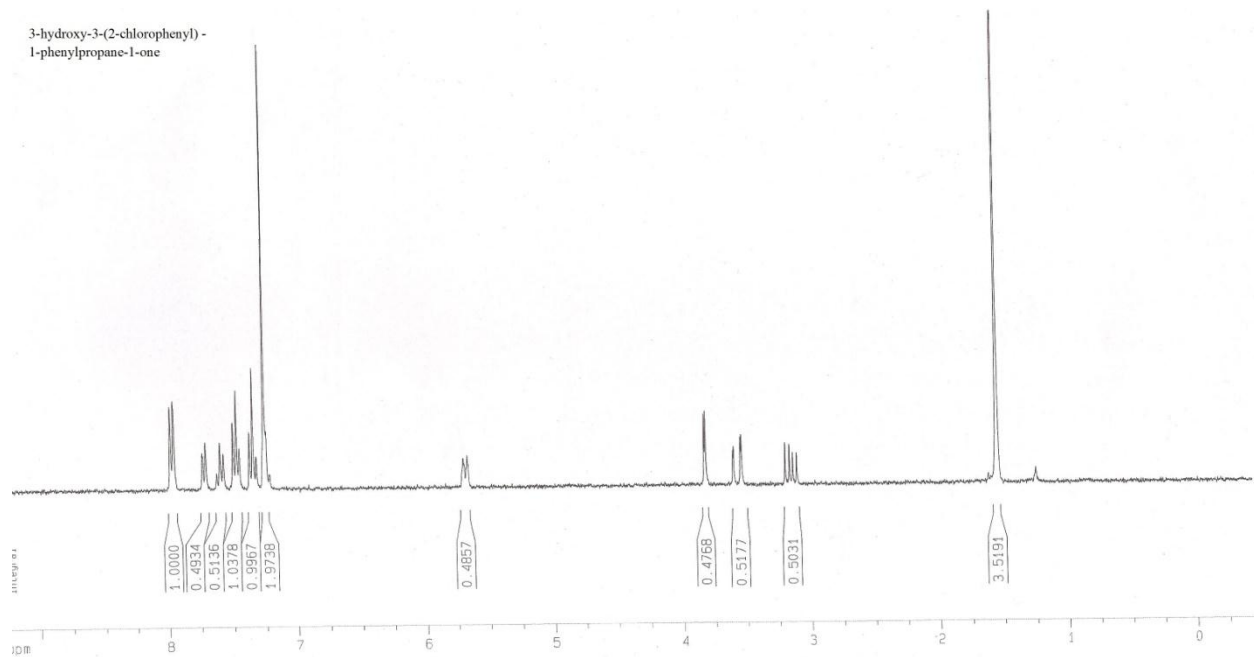

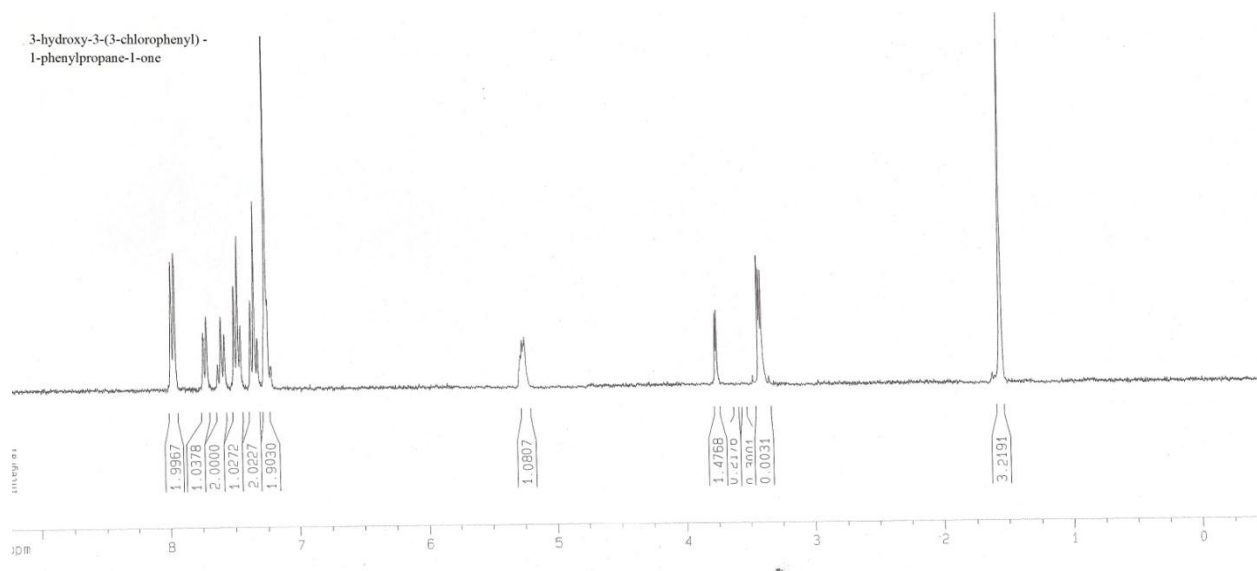

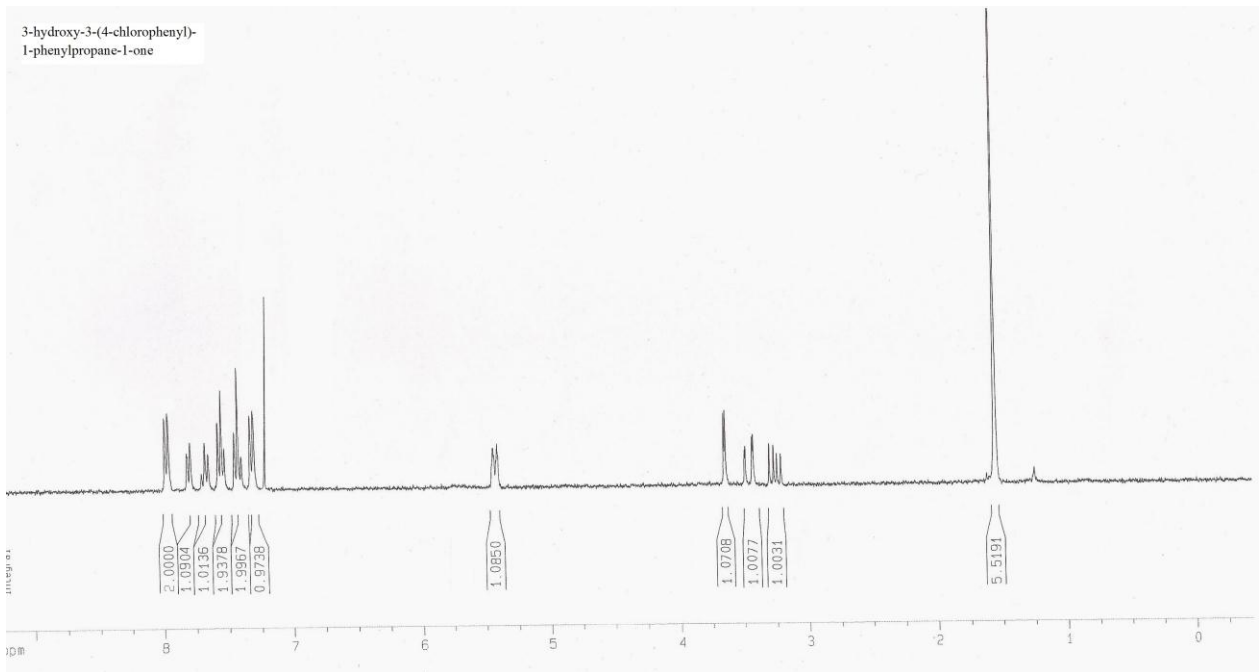

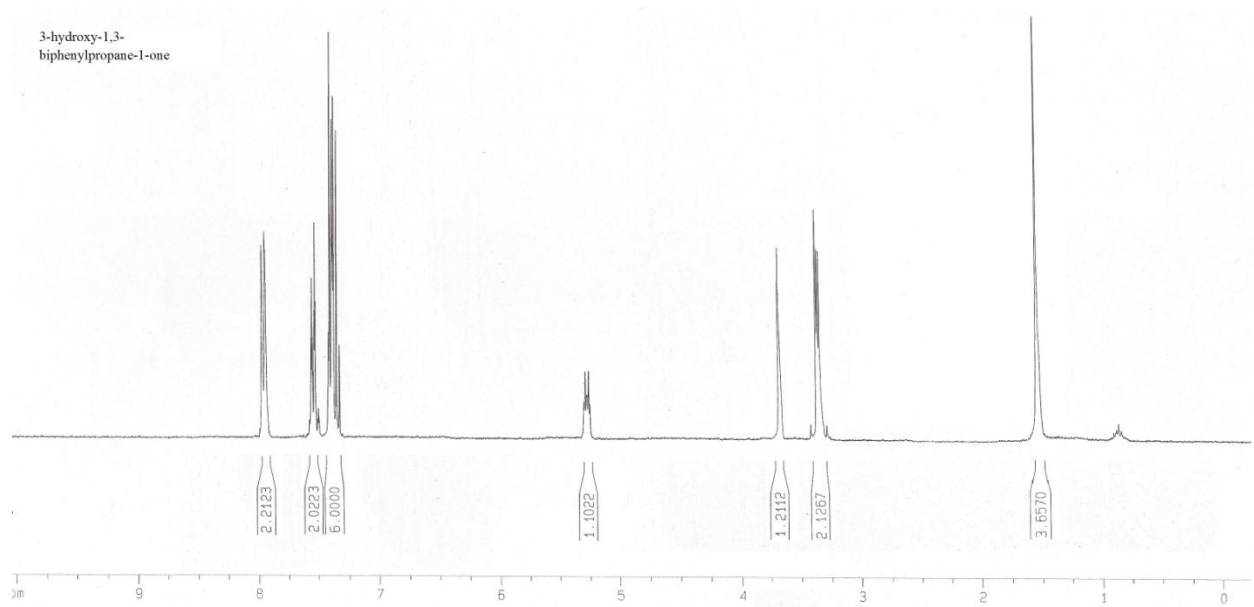

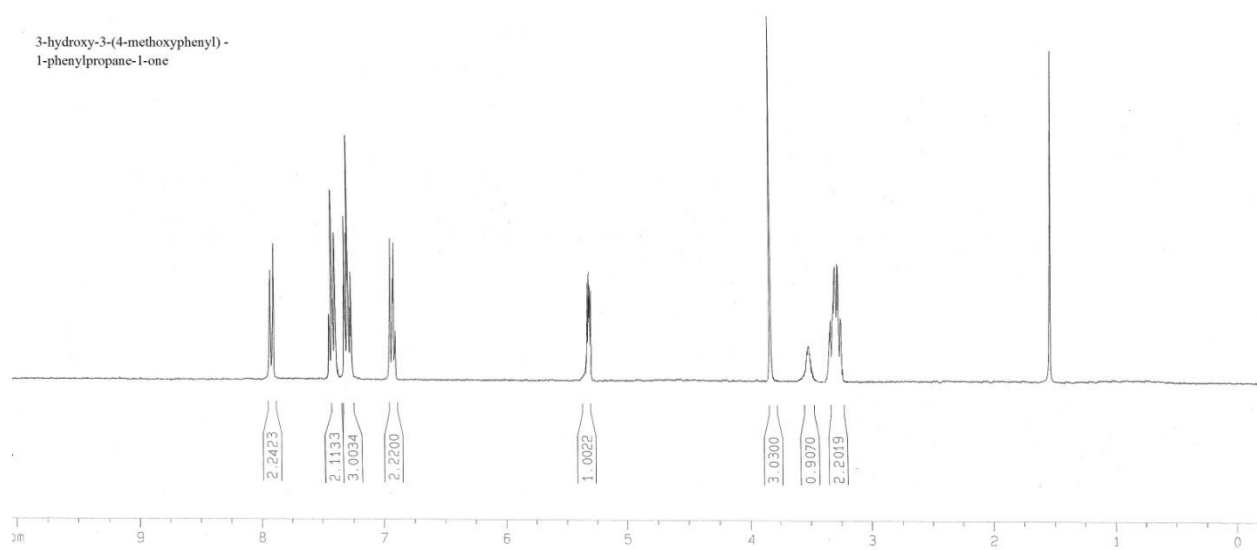

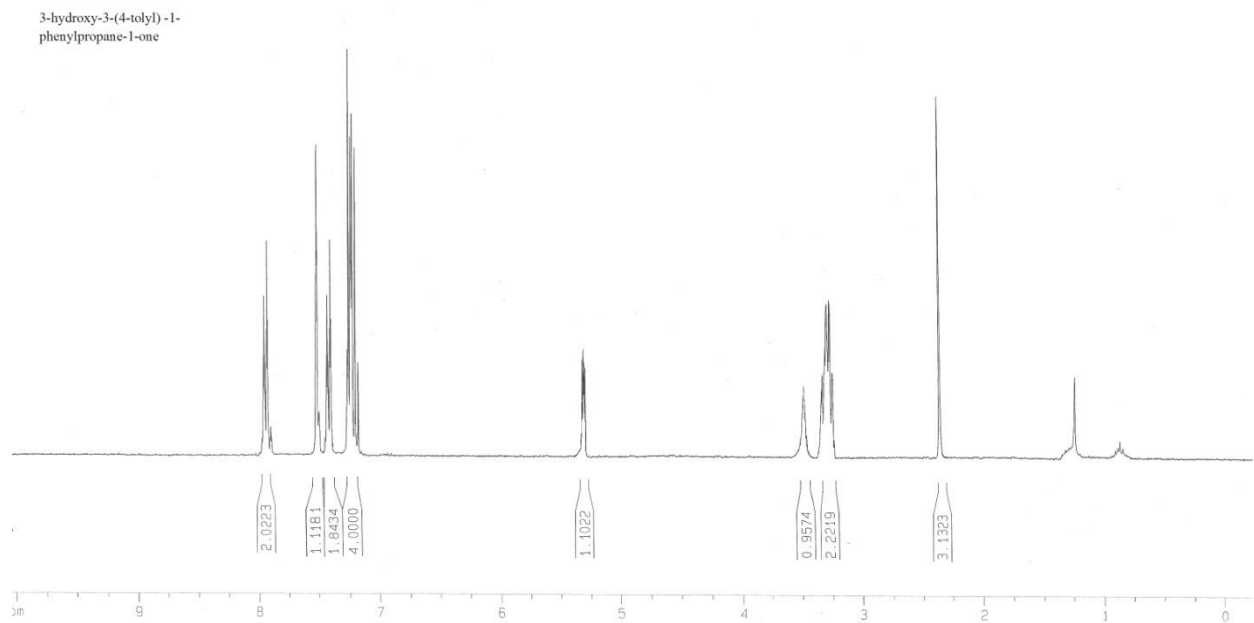

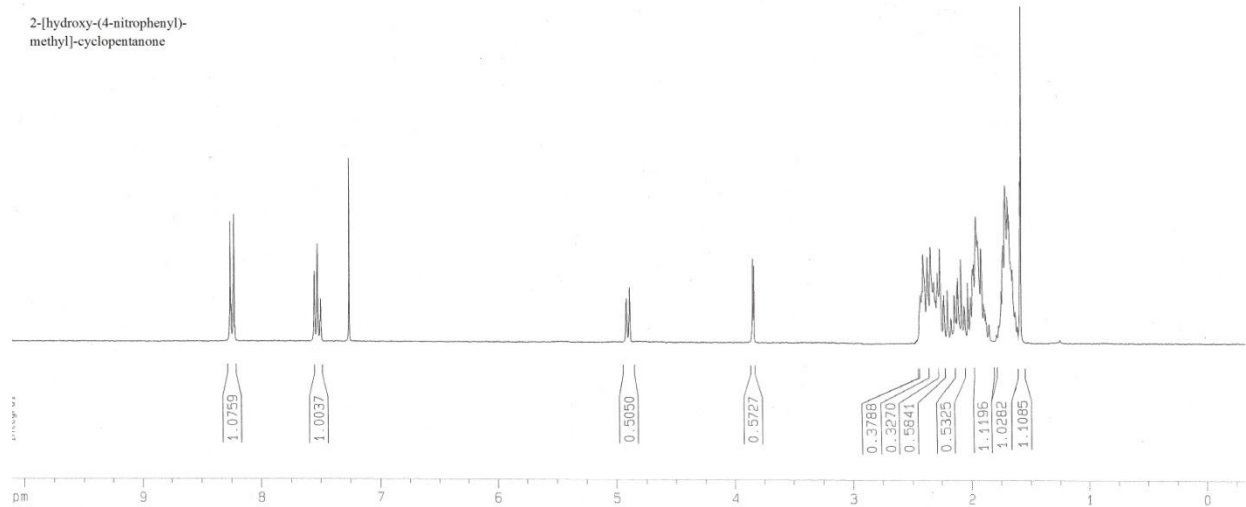

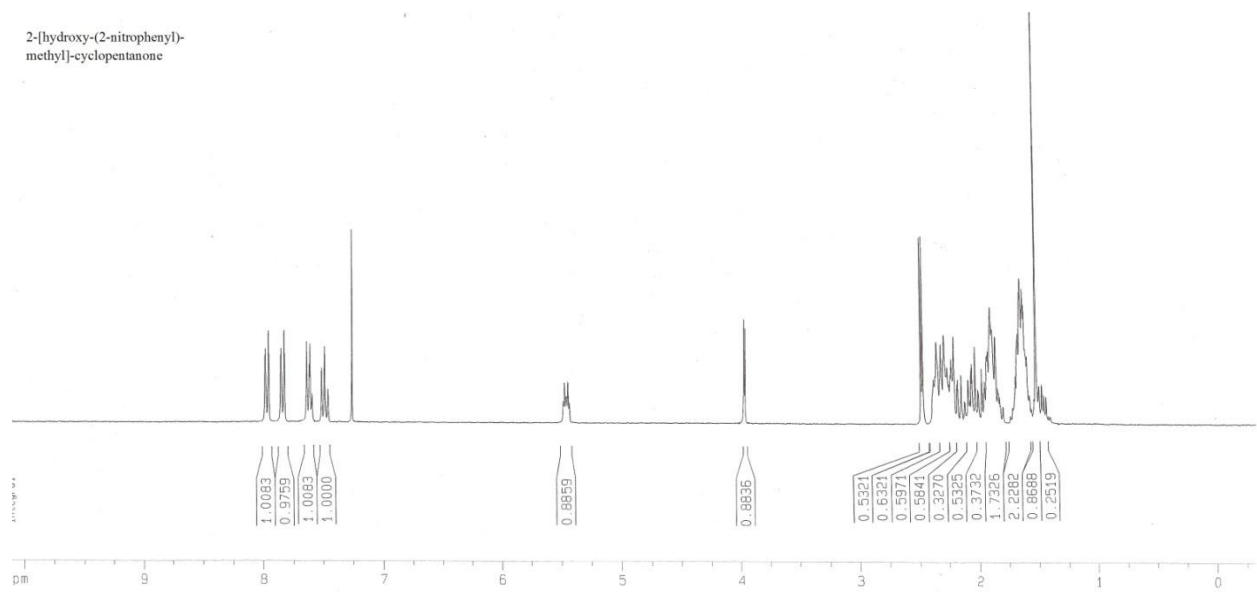

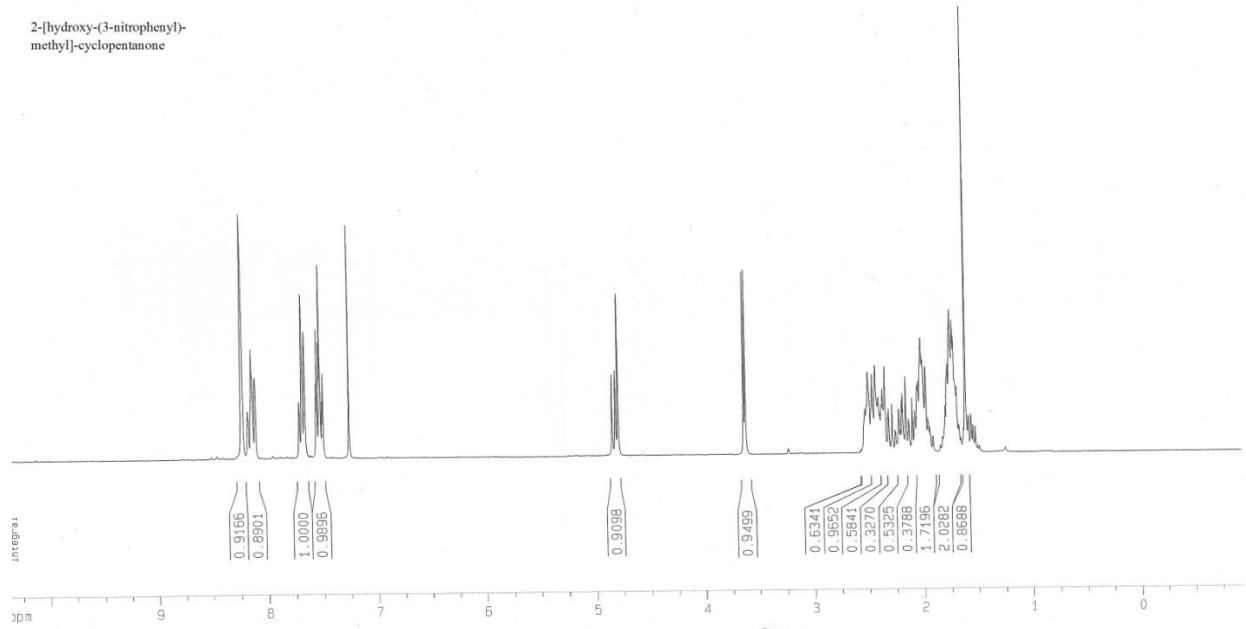

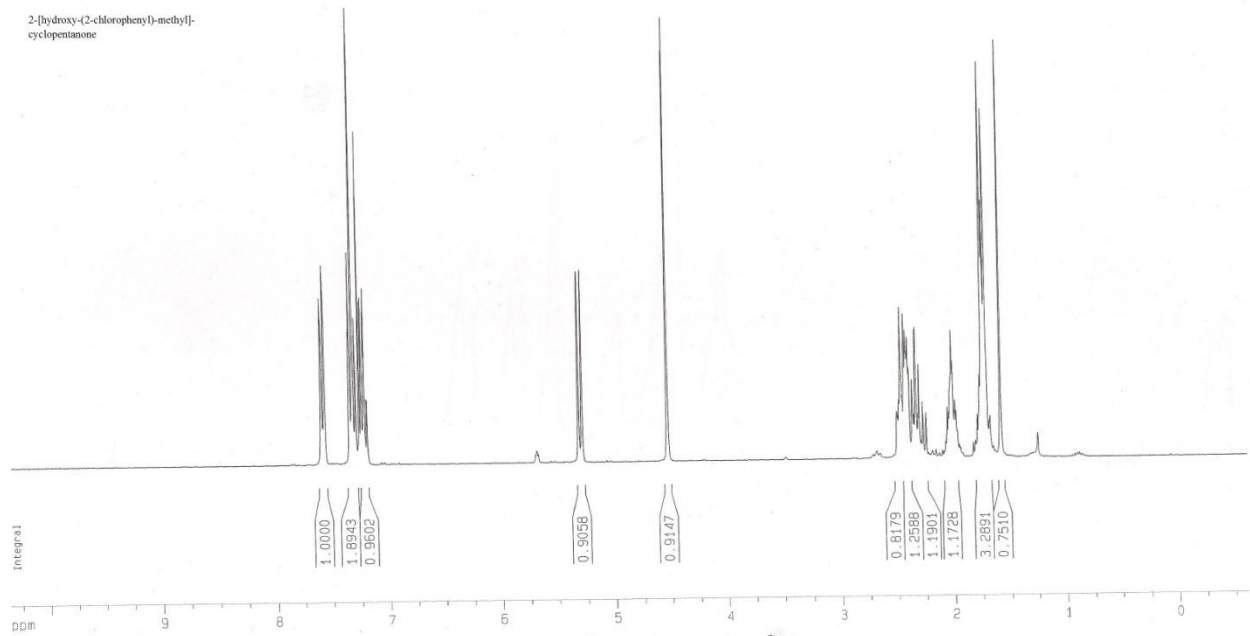

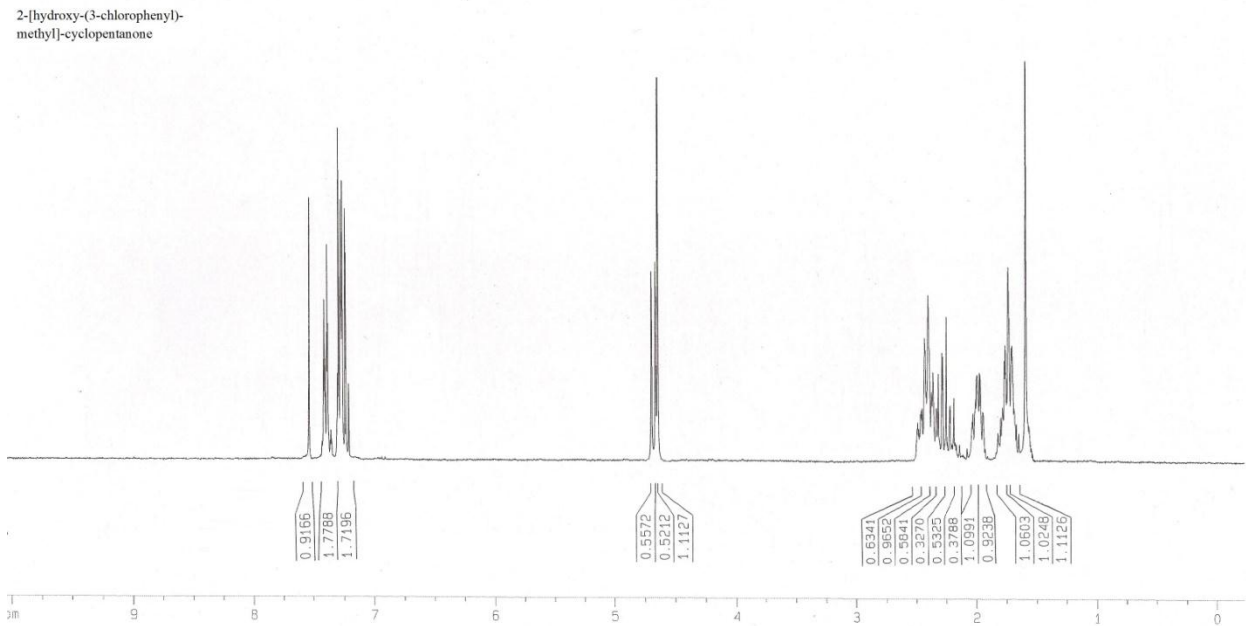

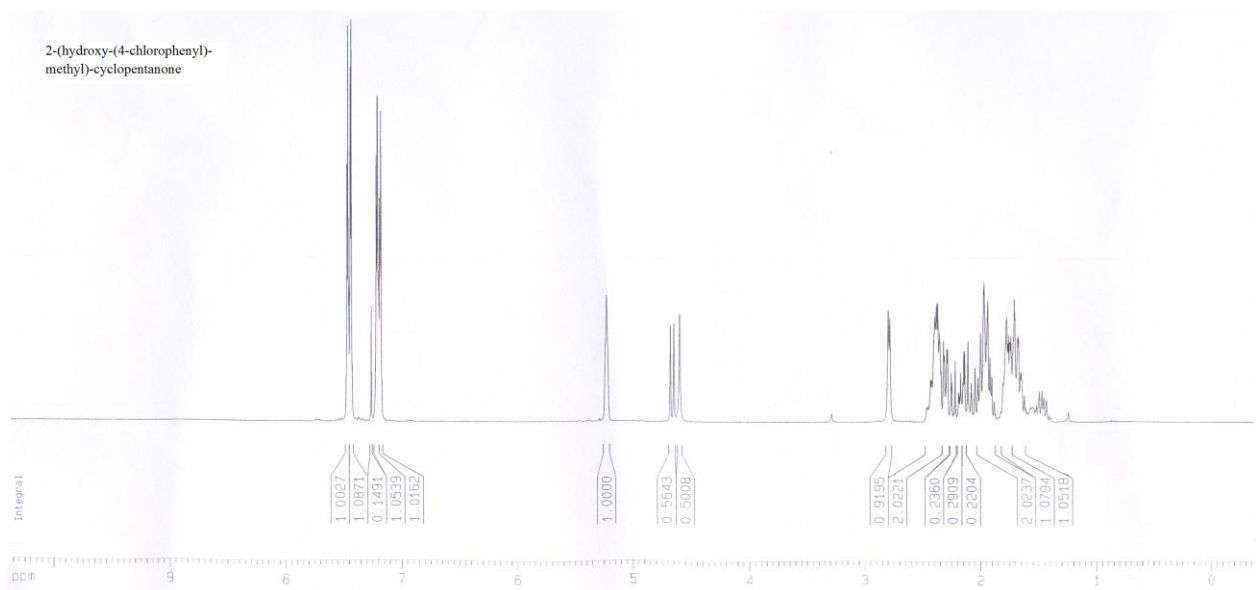

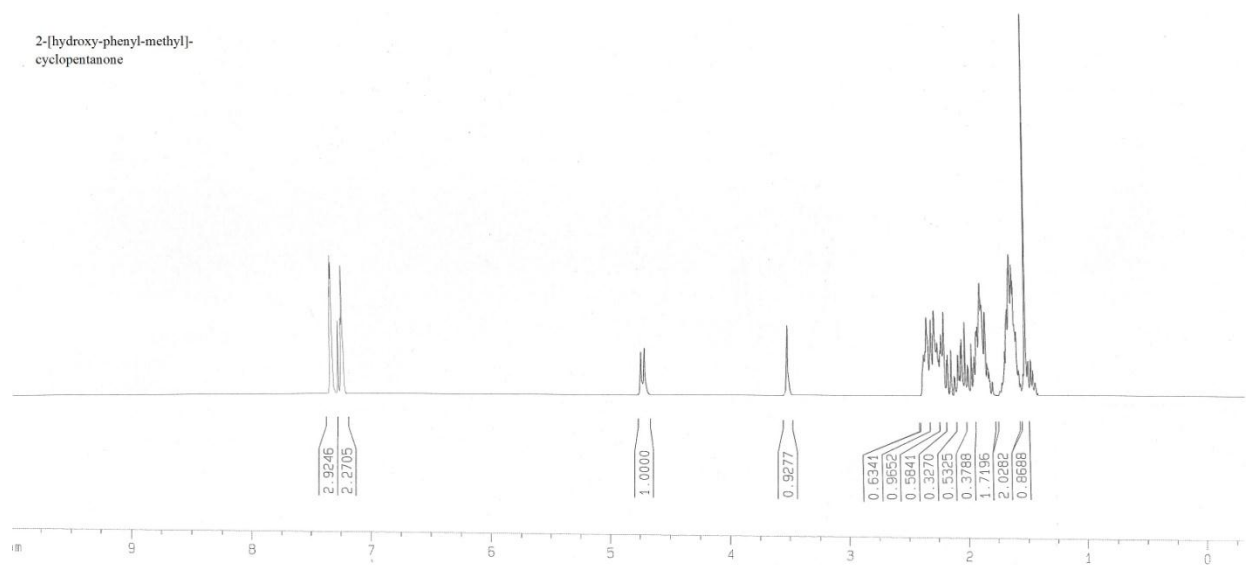

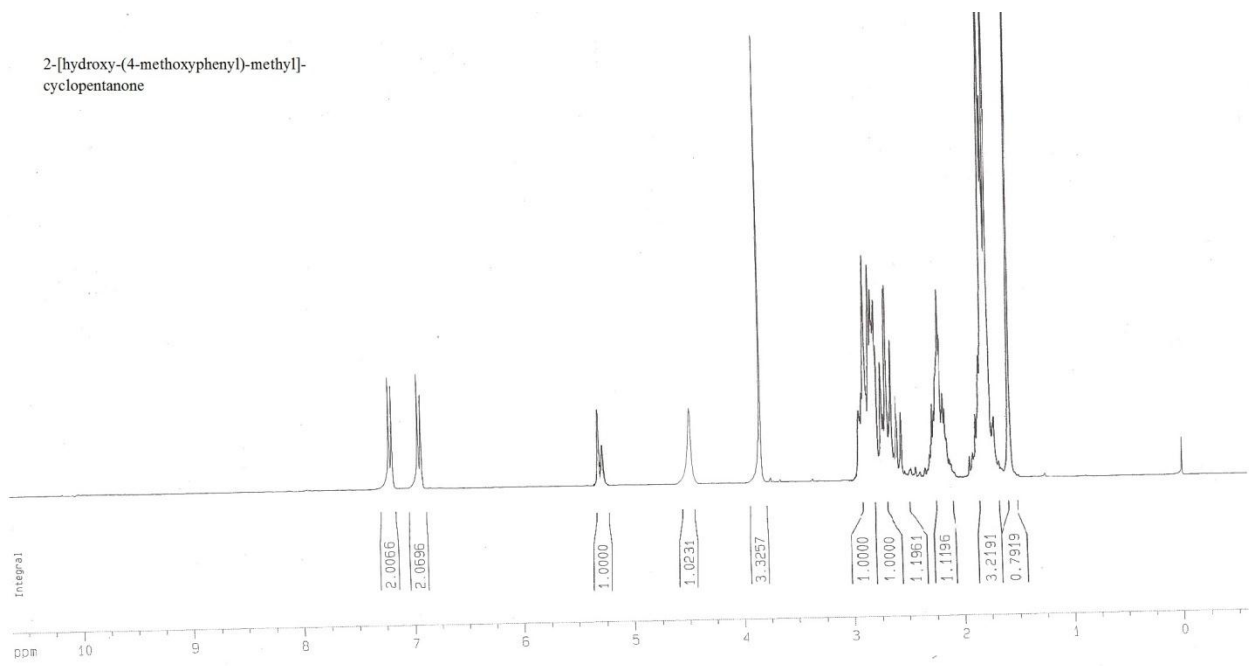

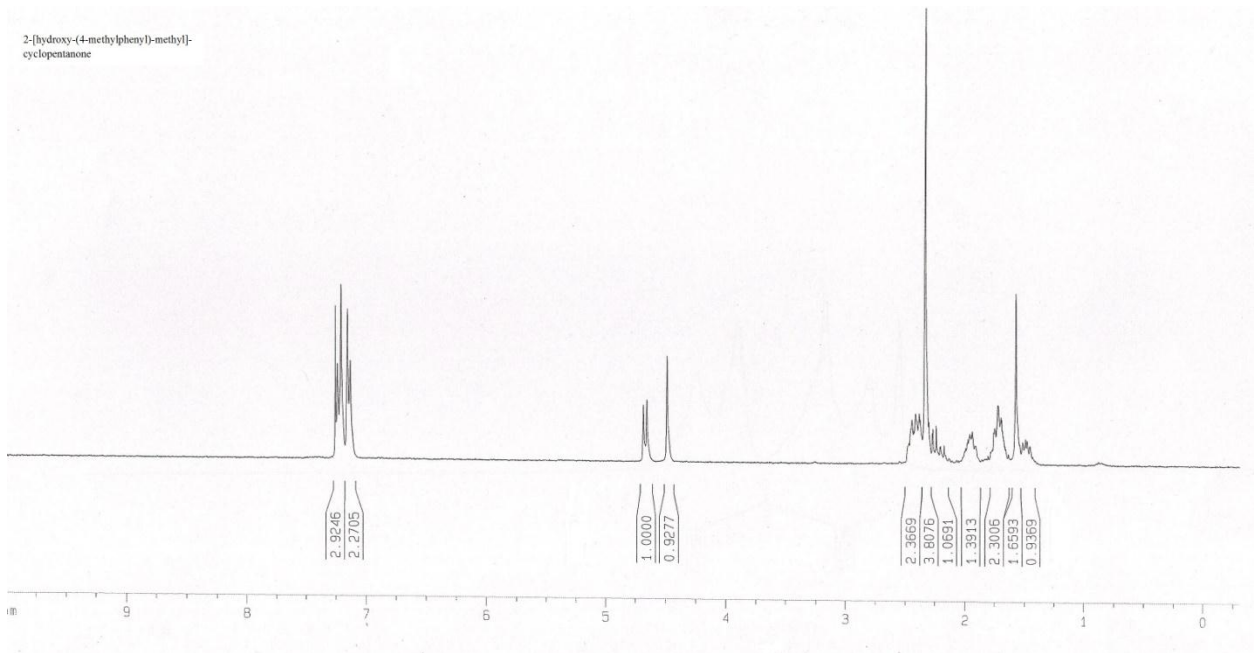

Supplement: c3dt51509e.pdf [file c3dt51509e.pdf]
